# Supplementary material for: Deciphering the electronic and structural origin of chiroptical activity of chiral 2D perovskites
Source: Royal Society of Chemistry journal article supplement (doi:10.1039/d4sc04915b), 2024-01-01
Supplement: d4sc04915b1.pdf [file d4sc04915b1.pdf]

**Supplementary Information for**

**Deciphering the Electronic and Structural Origin of Chiroptical  
Activity of Chiral 2D Perovskites**

Zixuan Zhang, Jin Wu, Haipeng Lu\*

Department of Chemistry, The Hong Kong University of Science and Technology, Clear Water  
Bay, Kowloon, Hong Kong, China (SAR)

**Corresponding Author**

Haipeng Lu\*: [haipenglu@ust.hk](mailto:haipenglu@ust.hk)

**Table S1. Crystal data and structure refinement for (*R*-3CIMBA)<sub>2</sub>PbBr<sub>4</sub> and (*R*-3CIMBA)<sub>2</sub>PbI<sub>4</sub>**

|                                | ( <i>R</i> -3CIMBA) <sub>2</sub> PbBr <sub>4</sub>                                       | ( <i>R</i> -3CIMBA) <sub>2</sub> PbI <sub>4</sub>                                          |
|--------------------------------|------------------------------------------------------------------------------------------|--------------------------------------------------------------------------------------------|
| Empirical formula              | C <sub>16</sub> H <sub>22</sub> Br <sub>4</sub> Cl <sub>2</sub> N <sub>2</sub> Pb        | C <sub>16</sub> H <sub>22</sub> Cl <sub>2</sub> I <sub>4</sub> N <sub>2</sub> Pb           |
| Formula weight                 | 840.08                                                                                   | 1028.04                                                                                    |
| Temperature                    | 100.00(10) K                                                                             | 99.99(10) K                                                                                |
| Wavelength                     | 0.71073 Å                                                                                | 0.71073 Å                                                                                  |
| Space group                    | <i>P</i> 2 <sub>1</sub>                                                                  | <i>P</i> 2 <sub>1</sub>                                                                    |
| Unit cell dimensions           | a = 8.7598(2) Å, α = 90°<br>b = 7.7798(2) Å, β = 97.984(2)°<br>c = 17.5050(4) Å, γ = 90° | a = 9.1762(2) Å, α = 90°<br>b = 8.18250(10) Å, β = 98.856(2)°<br>c = 17.4483(3) Å, γ = 90° |
| Volume                         | 1181.39(5) Å <sup>3</sup>                                                                | 1294.47(4) Å <sup>3</sup>                                                                  |
| Z                              | 2                                                                                        | 2                                                                                          |
| Density (calculated)           | 2.362 g/cm <sup>3</sup>                                                                  | 2.638 g/cm <sup>3</sup>                                                                    |
| Absorption coefficient         | 14.135 mm <sup>-1</sup>                                                                  | 11.497 mm <sup>-1</sup>                                                                    |
| F(000)                         | 776                                                                                      | 920                                                                                        |
| Crystal size                   | 0.11 x 0.08 x 0.07 mm <sup>3</sup>                                                       | 0.07 x 0.04 x 0.03 mm <sup>3</sup>                                                         |
| θ range for data collection    | 2.348 to 26.731°                                                                         | 2.363 to 26.729°                                                                           |
| Reflections collected          | 7306                                                                                     | 8228                                                                                       |
| Independent reflections        | 4643 [R <sub>int</sub> = 0.0255]                                                         | 4650 [R <sub>int</sub> = 0.0250]                                                           |
| Data / restraints / parameters | 4643 / 7 / 230                                                                           | 4650 / 31 / 230                                                                            |
| Goodness-of-fit                | 1.033                                                                                    | 0.999                                                                                      |
| Final R indices [I > 2σ(I)]    | R <sub>obs</sub> = 0.0307, wR <sub>obs</sub> = 0.0673                                    | R <sub>obs</sub> = 0.0227, wR <sub>obs</sub> = 0.0465                                      |
| R indices [all data]           | R <sub>all</sub> = 0.0335, wR <sub>all</sub> = 0.0691                                    | R <sub>all</sub> = 0.0244, wR <sub>all</sub> = 0.0473                                      |
| Largest diff. peak and hole    | 1.942 and -1.389 e·Å <sup>-3</sup>                                                       | 0.713 and -1.229 e·Å <sup>-3</sup>                                                         |

<sup>a</sup>R =  $\Sigma||F_o|-|F_c|| / \Sigma|F_o|$ , wR =  $\{\Sigma[w(|F_o|^2 - |F_c|^2)^2] / \Sigma[w(|F_o|^4)]\}^{1/2}$  and  $w=1/[\sigma^2(F_o^2)+(0.0325P)^2]$  where  $P=(F_o^2+2F_c^2)/3$ . <sup>b</sup>R =  $\Sigma||F_o|-|F_c|| / \Sigma|F_o|$ , wR =  $\{\Sigma[w(|F_o|^2 - |F_c|^2)^2] / \Sigma[w(|F_o|^4)]\}^{1/2}$  and  $w=1/[\sigma^2(F_o^2)+(0.0171P)^2]$  where  $P=(F_o^2+2F_c^2)/3$ .

**Table S2. Crystal data and structure refinement for (*R*-3BrMBA)<sub>2</sub>PbBr<sub>4</sub> and (*R*-3BrMBA)<sub>2</sub>PbI<sub>4</sub>**

|                                | ( <i>R</i> -3BrMBA) <sub>2</sub> PbBr <sub>4</sub>                | ( <i>R</i> -3BrMBA) <sub>2</sub> PbI <sub>4</sub>                                |
|--------------------------------|-------------------------------------------------------------------|----------------------------------------------------------------------------------|
| Empirical formula              | C <sub>16</sub> H <sub>22</sub> Br <sub>6</sub> N <sub>2</sub> Pb | C <sub>16</sub> H <sub>22</sub> Br <sub>2</sub> I <sub>4</sub> N <sub>2</sub> Pb |
| Formula weight                 | 929.00                                                            | 1116.96                                                                          |
| Temperature                    | 173.00(10) K                                                      | 173.00(10) K                                                                     |
| Wavelength                     | 1.54184 Å                                                         | 1.54184 Å                                                                        |
| Space group                    | <i>P</i> 2 <sub>1</sub>                                           | <i>P</i> 2 <sub>1</sub>                                                          |
| Unit cell dimensions           | a = 8.73840(10) Å, α = 90°                                        | a = 9.1768(2) Å, α = 90°                                                         |
|                                | b = 7.84410(10) Å, β = 97.8460(10)°                               | b = 8.2407(2) Å, β = 98.883(2)°                                                  |
|                                | c = 17.9204(2) Å, γ = 90°                                         | c = 17.8463(5) Å, γ = 90°                                                        |
| Volume                         | 1216.85(3) Å <sup>3</sup>                                         | 1333.40(6) Å <sup>3</sup>                                                        |
| Z                              | 2                                                                 | 2                                                                                |
| Density (calculated)           | 2.535 g/cm <sup>3</sup>                                           | 2.782 g/cm <sup>3</sup>                                                          |
| Absorption coefficient         | 25.048 mm <sup>-1</sup>                                           | 52.197 mm <sup>-1</sup>                                                          |
| F(000)                         | 848                                                               | 992                                                                              |
| Crystal size                   | 0.2 x 0.18 x 0.03 mm <sup>3</sup>                                 | 0.03 x 0.03 x 0.02 mm <sup>3</sup>                                               |
| θ range for data collection    | 2.489 to 74.513°                                                  | 4.878 to 74.263°                                                                 |
| Reflections collected          | 9475                                                              | 7755                                                                             |
| Independent reflections        | 4738 [R <sub>int</sub> = 0.0418]                                  | 4452 [R <sub>int</sub> = 0.0302]                                                 |
| Data / restraints / parameters | 4738 / 100 / 230                                                  | 4452 / 55 / 230                                                                  |
| Goodness-of-fit                | 1.053                                                             | 1.004                                                                            |
| Final R indices [I > 2σ(I)]    | R <sub>obs</sub> = 0.0476, wR <sub>obs</sub> = 0.1329             | R <sub>obs</sub> = 0.0251, wR <sub>obs</sub> = 0.0548                            |
| R indices [all data]           | R <sub>all</sub> = 0.0482, wR <sub>all</sub> = 0.1340             | R <sub>all</sub> = 0.0280, wR <sub>all</sub> = 0.0559                            |
| Largest diff. peak and hole    | 2.918 and -2.067 e·Å <sup>-3</sup>                                | 1.043 and -0.830 e·Å <sup>-3</sup>                                               |

<sup>a</sup>R =  $\Sigma||F_o|-|F_c|| / \Sigma|F_o|$ , wR =  $\{\Sigma[w(|F_o|^2 - |F_c|^2)^2] / \Sigma[w(|F_o|^4)]\}^{1/2}$  and  $w=1/[\sigma^2(F_o^2)+(0.1102P)^2]$  where  $P=(F_o^2+2F_c^2)/3$ . <sup>b</sup>R =  $\Sigma||F_o|-|F_c|| / \Sigma|F_o|$ , wR =  $\{\Sigma[w(|F_o|^2 - |F_c|^2)^2] / \Sigma[w(|F_o|^4)]\}^{1/2}$  and  $w=1/[\sigma^2(F_o^2)+(0.0207P)^2]$  where  $P=(F_o^2+2F_c^2)/3$ .

**Table S3. Crystal data and structure refinement for (R-4BrMBA)<sub>2</sub>PbBr<sub>4</sub>**

| <b>(R-4BrMBA)<sub>2</sub>PbBr<sub>4</sub></b>       |                                                                                                |
|-----------------------------------------------------|------------------------------------------------------------------------------------------------|
| Empirical formula                                   | C <sub>32</sub> H <sub>48</sub> Br <sub>12</sub> N <sub>4</sub> O <sub>2</sub> Pb <sub>2</sub> |
| Formula weight                                      | 1894.04                                                                                        |
| Temperature                                         | 99.99(10) K                                                                                    |
| Wavelength                                          | 0.71073 Å                                                                                      |
| Space group                                         | <i>P</i> 2 <sub>1</sub>                                                                        |
|                                                     | <i>a</i> = 7.8357(2) Å, <i>α</i> = 90°                                                         |
| Unit cell dimensions                                | <i>b</i> = 35.9831(11) Å, <i>β</i> = 90.903(2)°                                                |
|                                                     | <i>c</i> = 8.8981(2) Å, <i>γ</i> = 90°                                                         |
| Volume                                              | 2508.53(11) Å <sup>3</sup>                                                                     |
| <i>Z</i>                                            | 2                                                                                              |
| Density (calculated)                                | 2.508 g/cm <sup>3</sup>                                                                        |
| Absorption coefficient                              | 16.292 mm <sup>-1</sup>                                                                        |
| F(000)                                              | 1736                                                                                           |
| Crystal size                                        | 0.17 x 0.15 x 0.03 mm <sup>3</sup>                                                             |
| θ range for data collection                         | 2.289 to 25.348°                                                                               |
| Reflections collected                               | 14228                                                                                          |
| Independent reflections                             | 7980 [ <i>R</i> <sub>int</sub> = 0.0402]                                                       |
| Data / restraints / parameters                      | 7980 / 219 / 483                                                                               |
| Goodness-of-fit                                     | 1.102                                                                                          |
| Final <i>R</i> indices [ <i>I</i> > 2σ( <i>I</i> )] | <i>R</i> <sub>obs</sub> = 0.0508, <i>wR</i> <sub>obs</sub> = 0.1222                            |
| <i>R</i> indices [all data]                         | <i>R</i> <sub>all</sub> = 0.0543, <i>wR</i> <sub>all</sub> = 0.1248                            |
| Largest diff. peak and hole                         | 3.143 and -2.295 e <sup>-</sup> Å <sup>-3</sup>                                                |

$$R = \frac{\sum||F_o| - |F_c||}{\sum|F_o|}, \quad wR = \left\{ \frac{\sum[w(|F_o|^2 - |F_c|^2)^2]}{\sum[w(|F_o|^4)]} \right\}^{1/2} \quad \text{and}$$

$$w = 1 / [\sigma^2(F_o^2) + (0.0583P)^2 + 30.7291P] \quad \text{where } P = (F_o^2 + 2F_c^2) / 3$$

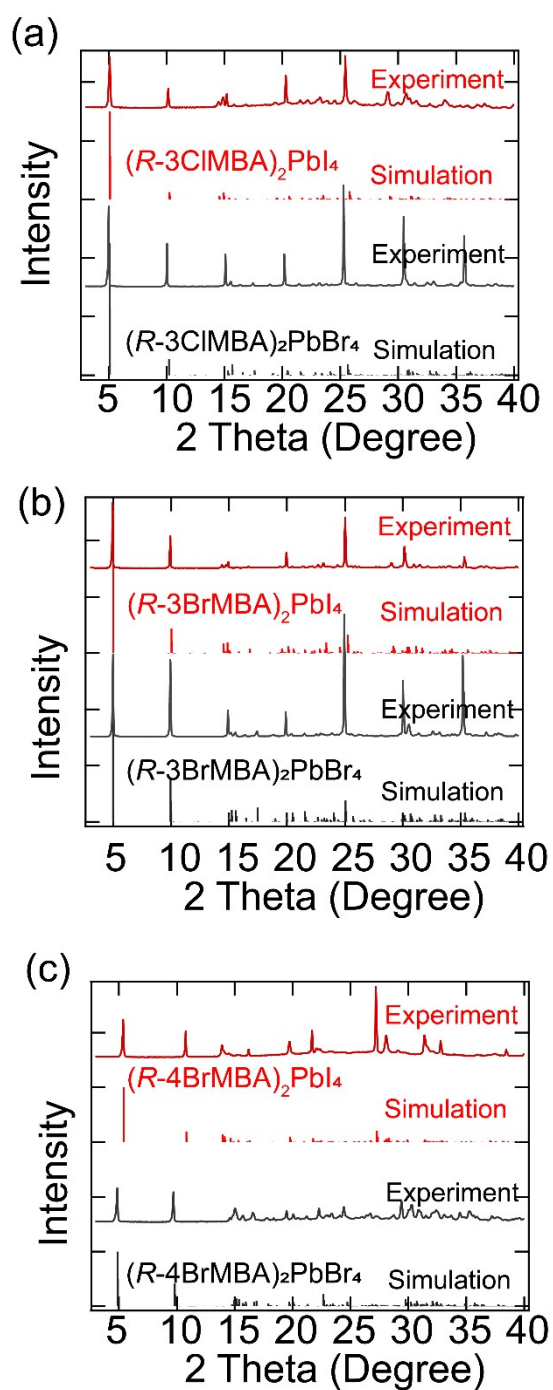

**Figure S1.** PXRD spectra for (a)  $(R-3CIMBA)_2PbX_4$ ; (b)  $(R-3BrMBA)_2PbX_4$  perovskites and (c)  $(R-4BrMBA)_2PbX_4$  (X indicates Br and I respectively).

### Supplementary Information Note I: the mechanism for different CD shapes

If we consider the CD spectra using the same mechanistic picture of MCD, but at zero magnetic field ( $B=0$ ), we can then apply the theory of MCD for the CD spectra interpretation. While MCD signal originates from the magnetic-field induced Zeeman splitting of the electronic states, CD signal originates from the intrinsic energy splitting or electronic states induced by chirality. The MCD intensity can be simplified by the sum of three Faraday terms, that is, A, B, and C terms:

$$\Delta A = \gamma\mu_B B \left[ A_1 \left( -\frac{df(E)}{dE} \right) + \left( B_0 + \frac{C_0}{k_B T} \right) f(E) \right]$$

Where  $\gamma$  is a constant.  $\mu_B$  is the Bohr magneton,  $B$  is the magnetic field,  $k_B$  is the Boltzmann constant,  $T$  is the temperature,  $E$  is the energy, and  $f(E)$  is the line-shape function.  $A_1$ ,  $B_0$ , and  $C_0$  are parameters that describe the A, B, and C terms of MCD, respectively. A, B, and C terms provide information about the Zeeman splitting of degenerate excited states, the field-induced mixing of zero-field states, and the Zeeman splitting based ground state population adjustment, respectively (as shown in the following Figure R1). When the A term is dominant, the CD spectra will be derivative shape, while when the C term is dominant, it will be Gaussian-like shape. We suspect that different chiral cations will modulate the degeneracy of both excited and ground states, that is, the conduction and valence band degeneracy. However, further computational work on the detailed band structure will be needed in order to confirm this.

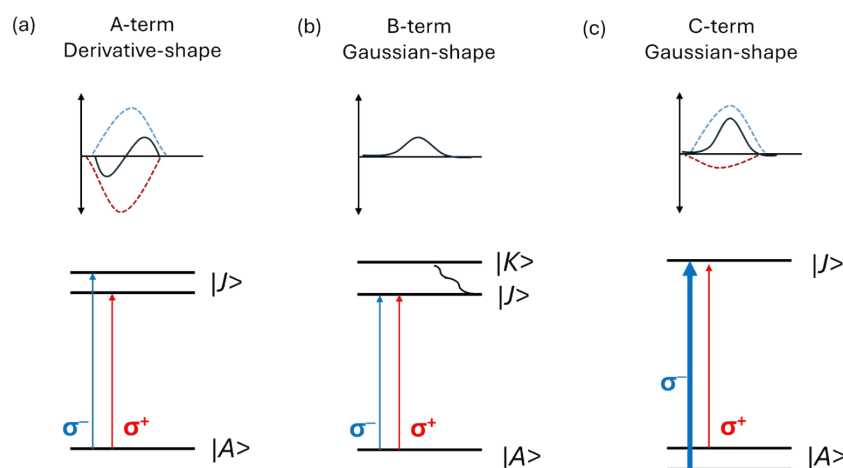

**Figure S2.** A, B, and C term intensity mechanisms for magnetic circular dichroism (MCD) signal.

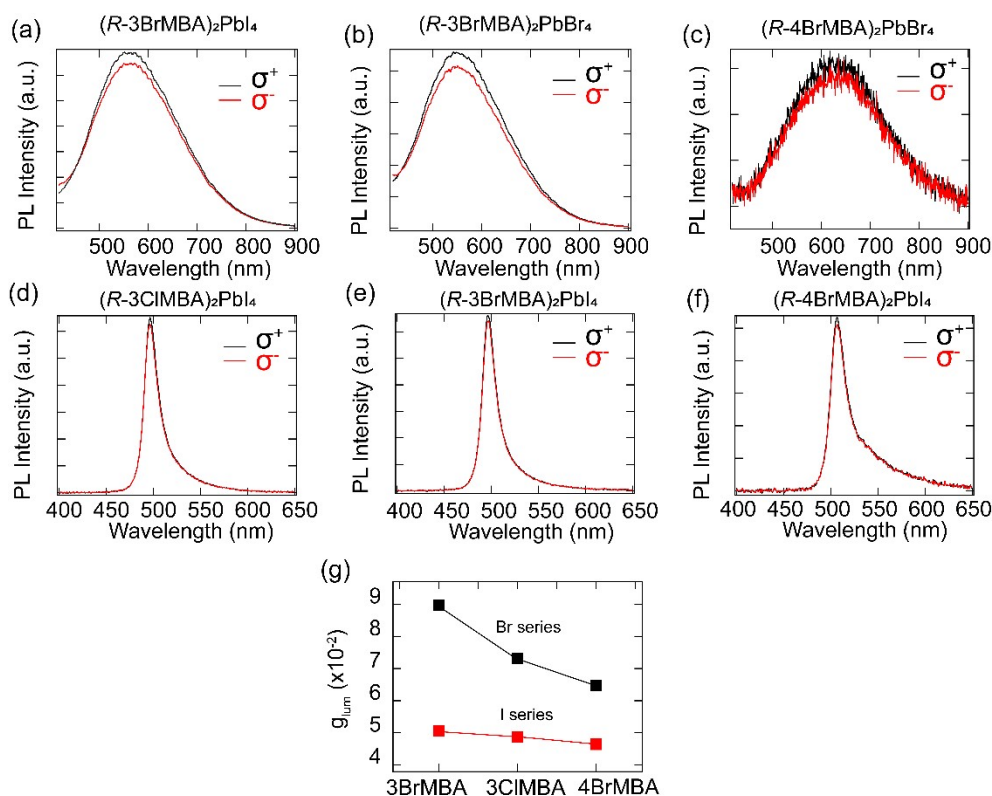

**Figure S3.** (a)-(f) CPL spectra for chiral 2D perovskites. (g) Dissymmetry factor ( $g_{lum}$ ) trend summary of Br series and I series perovskites.

### Supplementary Information Note II

The CPL dissymmetry factor ( $g_{lum}$ ) is calculated by **eq 1**, where  $I_L$  and  $I_R$  represent the intensity of right-handed and left-handed CPL, respectively.

$$g_{lum} = 2 \times \frac{I_L - I_R}{I_L + I_R} \quad \text{Eq. 1}$$

The calculated dissymmetry factor ( $g_{lum}$ ) value is within  $10^{-2}$  scale (**Figure S2g**), which increase by one order of magnitude compared to the reported 2D lead-based chiral perovskites. Interestingly, the  $g_{lum}$  values exhibit the same trend as the  $g_{CD}$  values, in which the Br series are larger than I series. The maximum  $g_{lum}$  value is obtained as  $\sim 0.09$  for  $(R-3BrMBA)_2PbBr_4$ , which is 1.8 times larger than its isostructure  $(R-3BrMBA)_2PbI_4$ . We attribute different performance of CD and CPL towards different chiral organic cations used, which affects the chiroptical performance via substituents effect.

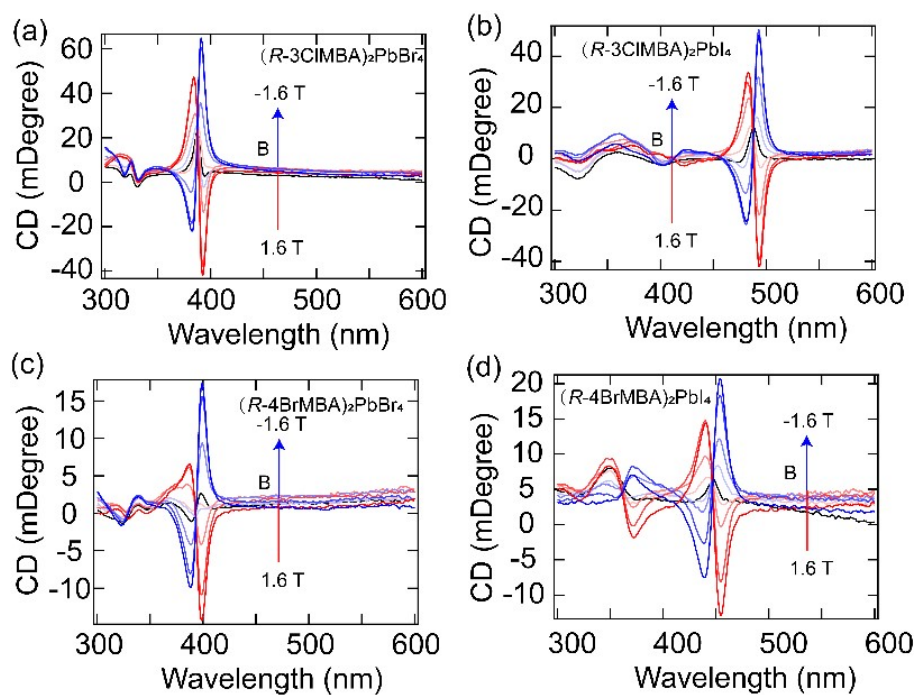

**Figure S4.** MCD spectra of (a)  $(R-3CIMBA)_2PbBr_4$ ; (b)  $(R-3CIMBA)_2PbI_4$ ; (c)  $(R-4BrMBA)_2PbBr_4$  and (d)  $(R-4BrMBA)_2PbI_4$  films under  $-1.6$  T to  $1.6$  T magnetic field.



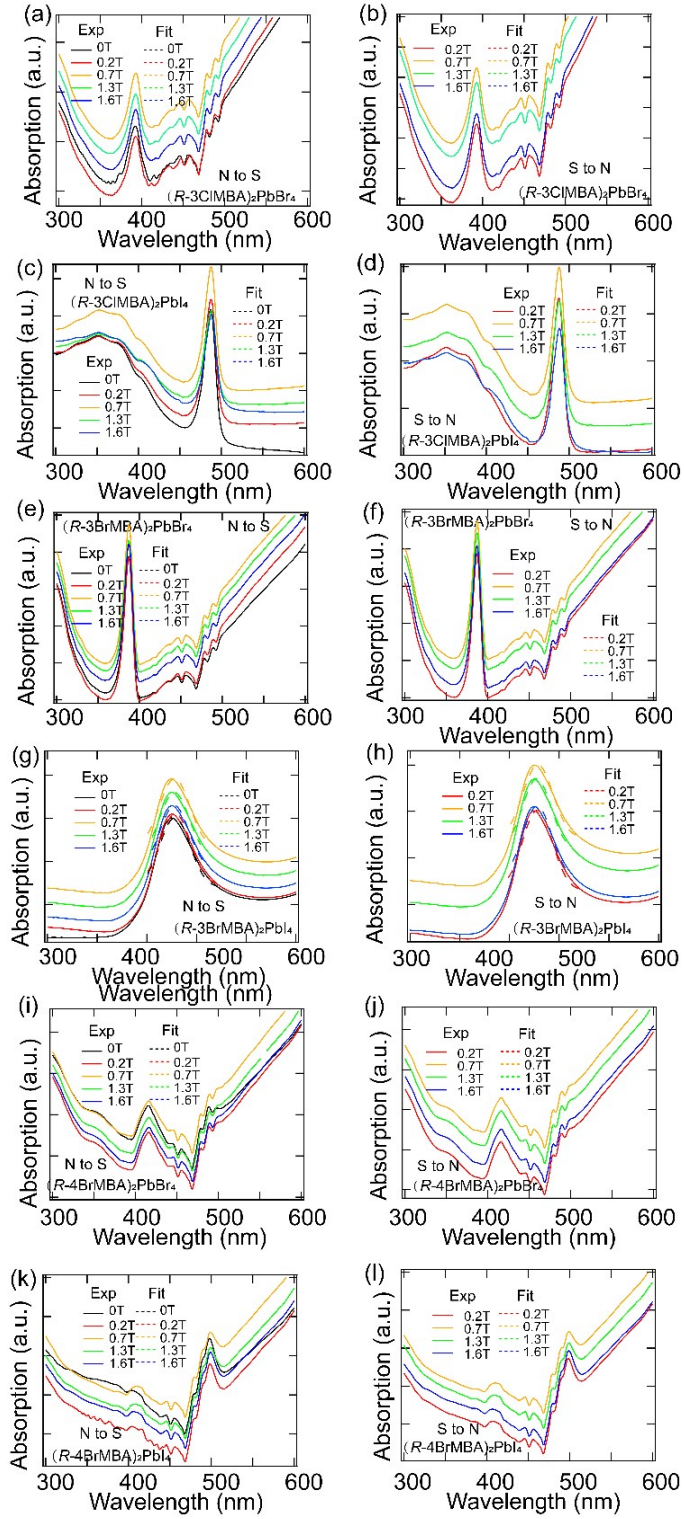

**Figure S5.** Absorption spectra and the Gaussian fitting curve of the  $(R-XMBA)_2PbX_4$  films under  $-1.6$  T to  $1.6$  T magnetic field.

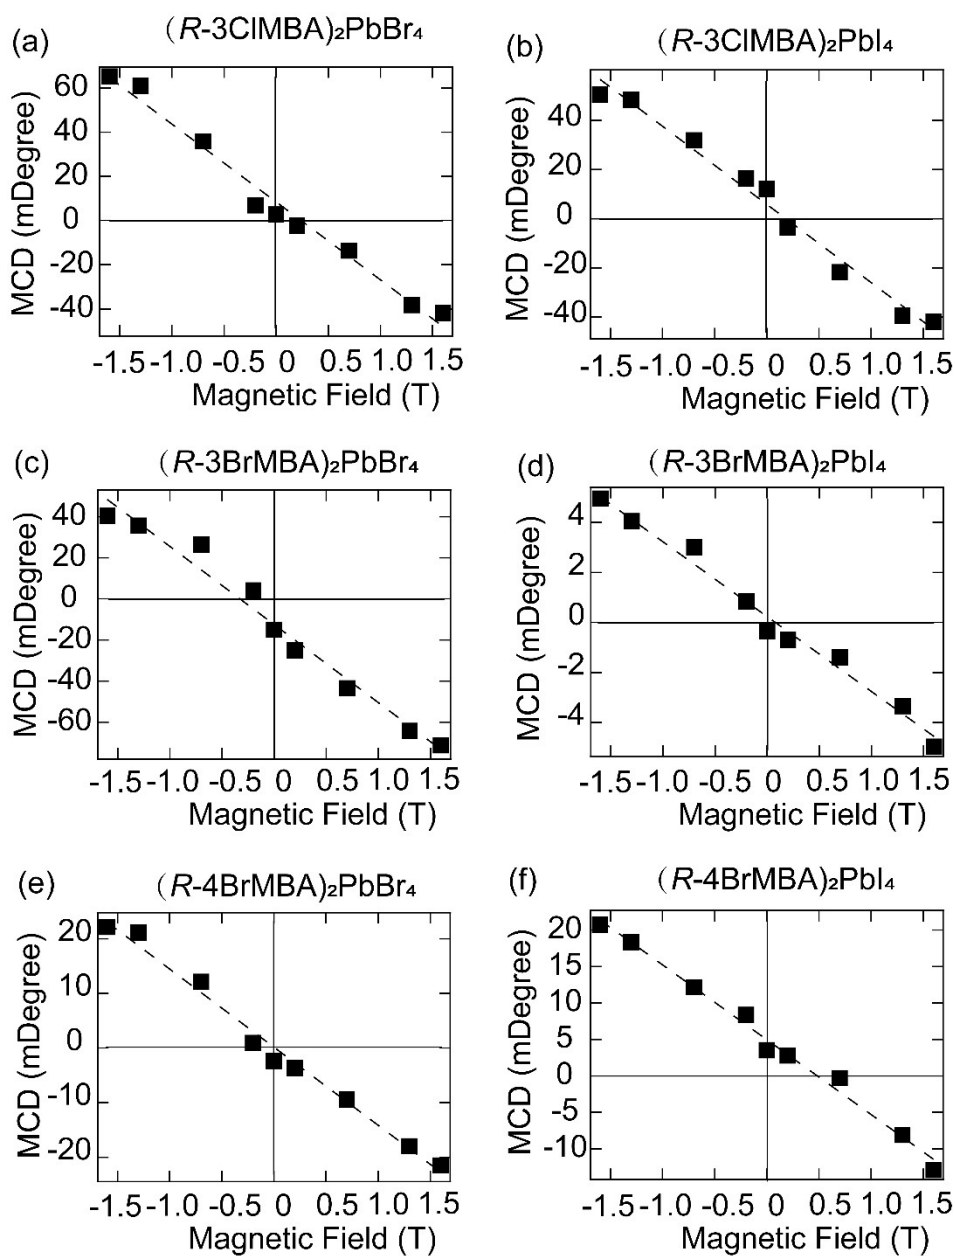

**Figure S6.** MCD versus external magnetic field and linear fitting curves for samples under  $-1.6T$  to  $1.6T$  magnetic field.

**Table S4.** Zeeman splitting energy calculation for  $(R-3CIMBA)_2PbBr_4$ .

| B(T) | MCD magnitude (mdeg) | Zeeman splitting energy (eV) |
|------|----------------------|------------------------------|
| -1.6 | 65.085               | 0.18488                      |
| -1.3 | 60.937               | 0.159935                     |
| -0.7 | 35.834               | 0.089712                     |
| -0.2 | -2.2661              | -0.00666                     |
| 0    | 2.7278               | 0.043622                     |
| 0.2  | 6.8909               | 0.021551                     |
| 0.7  | -13.598              | -0.03159                     |
| 1.3  | -38.114              | -0.09765                     |
| 1.6  | -41.821              | -0.11507                     |

**Table S5.** Zeeman splitting energy calculation for  $(R-3CIMBA)_2PbI_4$ .

| B(T) | MCD magnitude (mdeg) | Zeeman splitting energy (eV) |
|------|----------------------|------------------------------|
| -1.6 | 48.349               | 0.097376973                  |
| -1.3 | 50.543               | 0.084579611                  |
| -0.7 | 31.929               | 0.045367987                  |
| -0.2 | 16.401               | 0.027453805                  |
| 0    | 12.067               | 0.0076923                    |
| 0.2  | -3.53                | -0.0057414                   |
| 0.7  | -21.795              | -0.028434479                 |
| 1.3  | -39.553              | -0.070088852                 |
| 1.6  | -42.038              | -0.074019506                 |

**Table S6.** Zeeman splitting energy calculation for **(R-3BrMBA)<sub>2</sub>PbBr<sub>4</sub>**.

| B(T) | MCD magnitude (mdeg) | Zeeman splitting energy (eV) |
|------|----------------------|------------------------------|
| -1.6 | 40.381               | 0.15254                      |
| -1.3 | 35.581               | 0.11835                      |
| -0.7 | 26.54                | 0.06672                      |
| -0.2 | 4.0762               | 0.0079                       |
| 0    | -15.001              | -0.067                       |
| 0.2  | -25.061              | -0.1105                      |
| 0.7  | -43.501              | -0.1743                      |
| 1.3  | -64.285              | -0.2335                      |
| 1.6  | -71.276              | -0.2611                      |

**Table S7.** Zeeman splitting energy calculation for **(R-3BrMBA)<sub>2</sub>PbI<sub>4</sub>**.

| B(T) | MCD magnitude (mdeg) | Zeeman splitting energy (eV) |
|------|----------------------|------------------------------|
| -1.6 | 4.0536               | 0.052913                     |
| -1.3 | 4.9566               | 0.026942                     |
| -0.7 | 3.0075               | 0.022923                     |
| -0.2 | 0.84565              | 0.018861                     |
| 0    | -0.34897             | 0.007783                     |
| 0.2  | -0.68733             | -0.01293                     |
| 0.7  | -1.3973              | -0.0134                      |
| 1.3  | -3.3456              | -0.03906                     |
| 1.6  | -4.9747              | -0.05482                     |

**Table S8.** Zeeman splitting energy calculation for **(R-4BrMBA)<sub>2</sub>PbBr<sub>4</sub>**.

| B(T) | MCD magnitude (mdeg) | Zeeman splitting energy (eV) |
|------|----------------------|------------------------------|
| -1.6 | 22.14                | 0.090655367                  |
| -1.3 | 21.126               | 0.070951572                  |
| -0.7 | 12.094               | 0.039450831                  |
| -0.2 | 0.90989              | 0.003938611                  |
| 0    | -2.3454              | -0.010119294                 |
| 0.2  | -3.666               | -0.015251613                 |
| 0.7  | -9.4571              | -0.031592251                 |
| 1.3  | -17.968              | -0.06426851                  |
| 1.6  | -21.515              | -0.080557896                 |

**Table S9.** Zeeman splitting energy calculation for **(R-4BrMBA)<sub>2</sub>PbI<sub>4</sub>**.

| B(T) | MCD magnitude (mdeg) | Zeeman splitting energy (eV) |
|------|----------------------|------------------------------|
| -1.6 | 20.774               | 0.049509                     |
| -1.3 | 18.363               | 0.038359                     |
| -0.7 | 12.166               | 0.024182                     |
| -0.2 | 8.3643               | 0.023246                     |
| 0    | 3.5299               | -0.003729                    |
| 0.2  | 2.7894               | 0.007554                     |
| 0.7  | -0.3009              | -0.00064                     |
| 1.3  | -8.1182              | -0.01698                     |
| 1.6  | -12.917              | -0.02861                     |

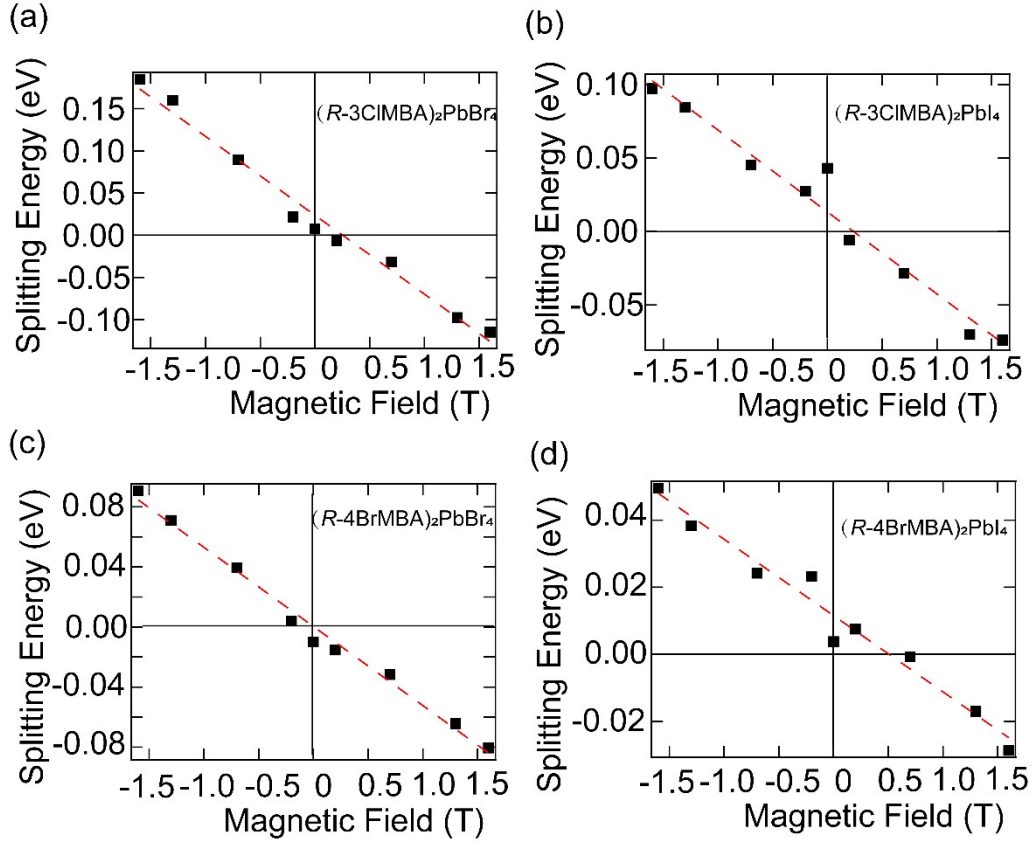

**Figure S7.** Splitting energy versus external magnetic field and the linear fitting curves for (a)  $(R-3CIMBA)_2PbBr_4$ ; (b)  $(R-3CIMBA)_2PbI_4$ ; (c)  $(R-4BrMBA)_2PbBr_4$  and (d)  $(R-4BrMBA)_2PbI_4$  films under  $-1.6$  T to  $1.6$  T magnetic field.

**Table S10.** Summary of parameters for quantifying exciton Landé  $g$  factor and intrinsic splitting energy of the chiral perovskites.

|                      | $g_{int}$ value | Intrinsic field-dependent exciton splitting (eV) ( $\times 10^{-3}$ ) |
|----------------------|-----------------|-----------------------------------------------------------------------|
| $(R-3CIMBA)_2PbBr_4$ | 1.62            | 43.6                                                                  |
| $(R-3CIMBA)_2PbI_4$  | 0.52            | 7.6                                                                   |
| $(R-3BrMBA)_2PbBr_4$ | 2.22            | 67.0                                                                  |
| $(R-3BrMBA)_2PbI_4$  | 0.96            | 7.7                                                                   |
| $(R-4BrMBA)_2PbBr_4$ | 0.90            | 10.1                                                                  |
| $(R-4BrMBA)_2PbI_4$  | 0.39            | 3.7                                                                   |
